# Supplementary figures and images for: Multifaceted secretion of htNSC-derived hypothalamic islets induces survival and antidiabetic effect via peripheral implantation in mice
Source: eLife journal article supplement (doi:10.7554/elife.52580), 2020-02-21

Figure 3—figure supplement 1

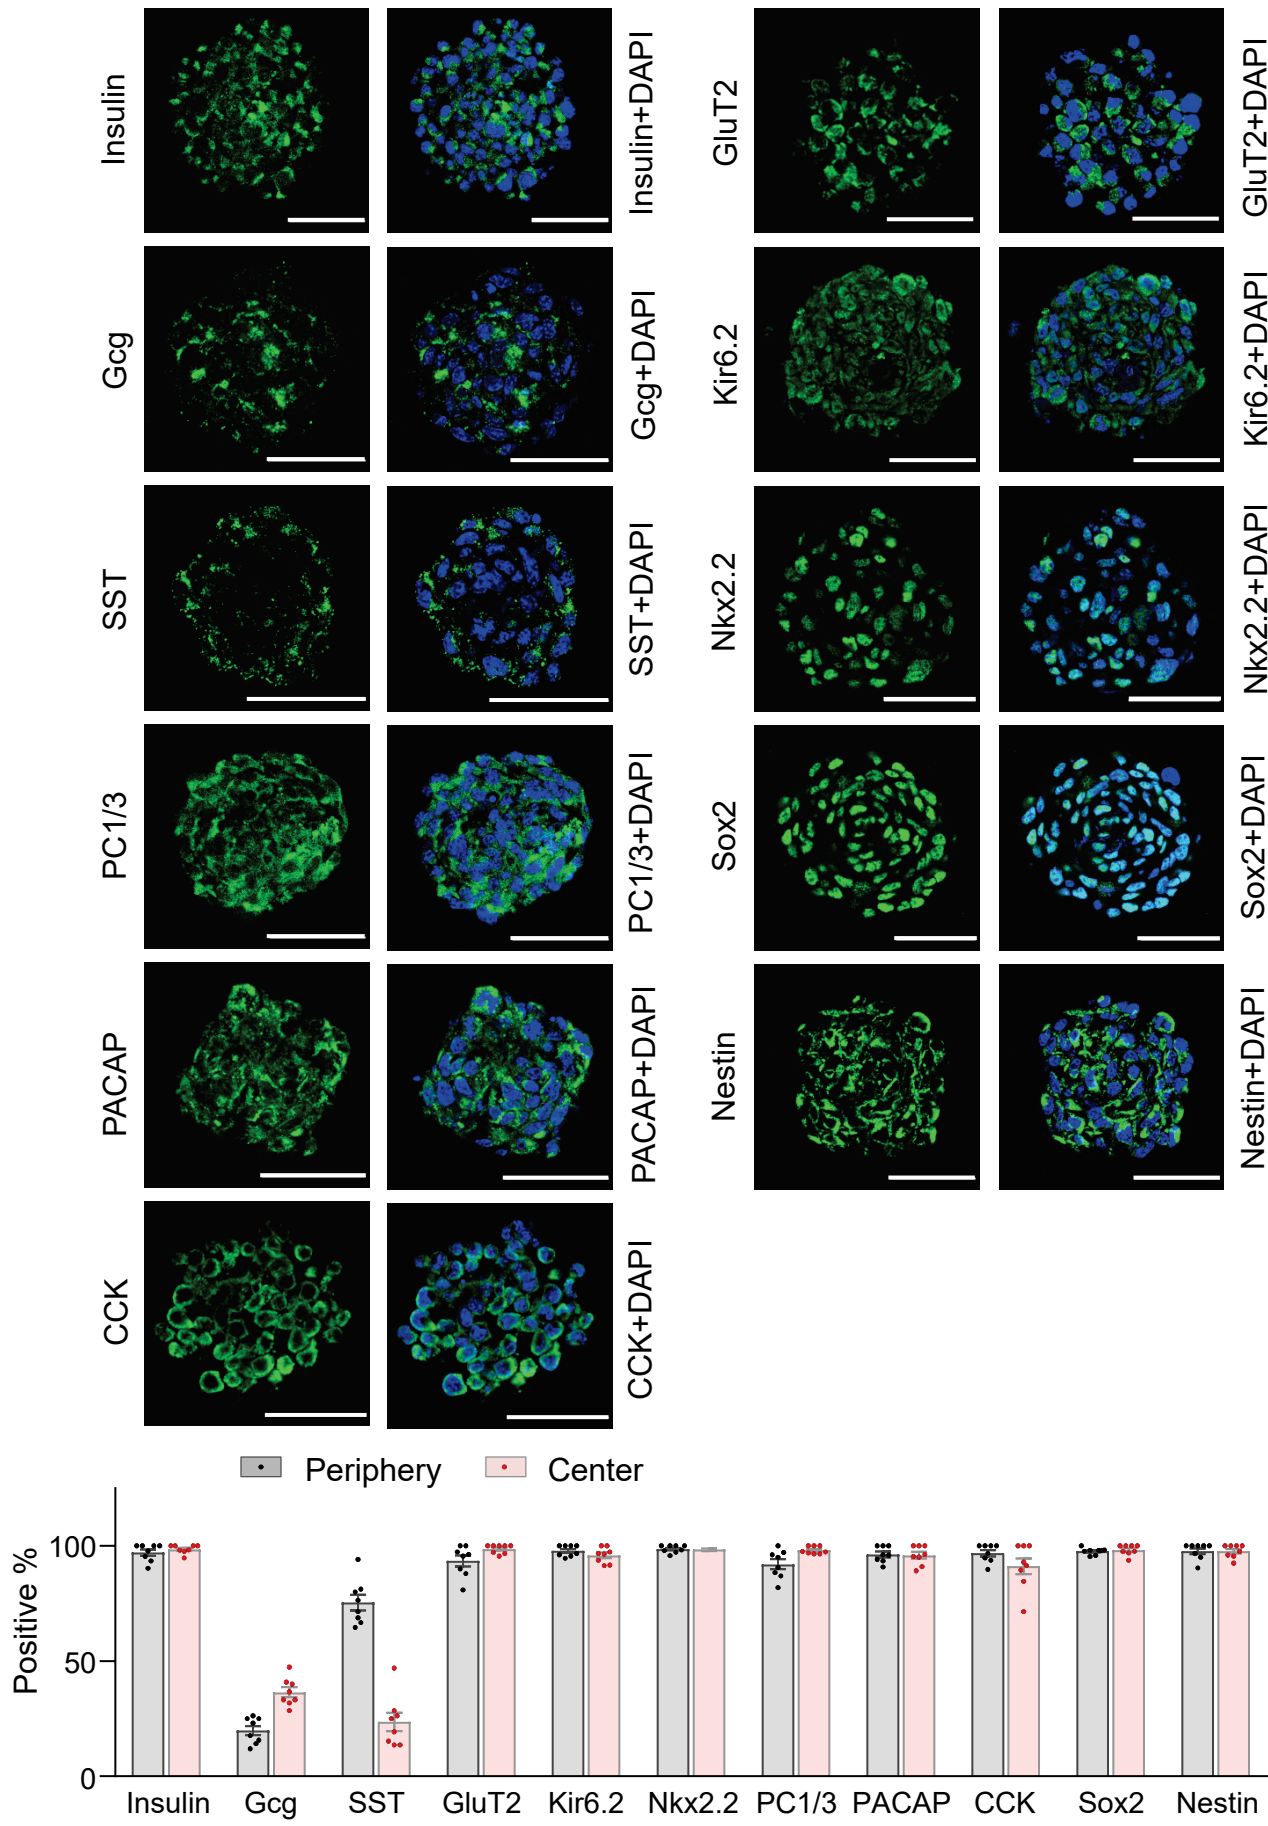

Supplement: supp [file elife-52580-supp-v1.zip]

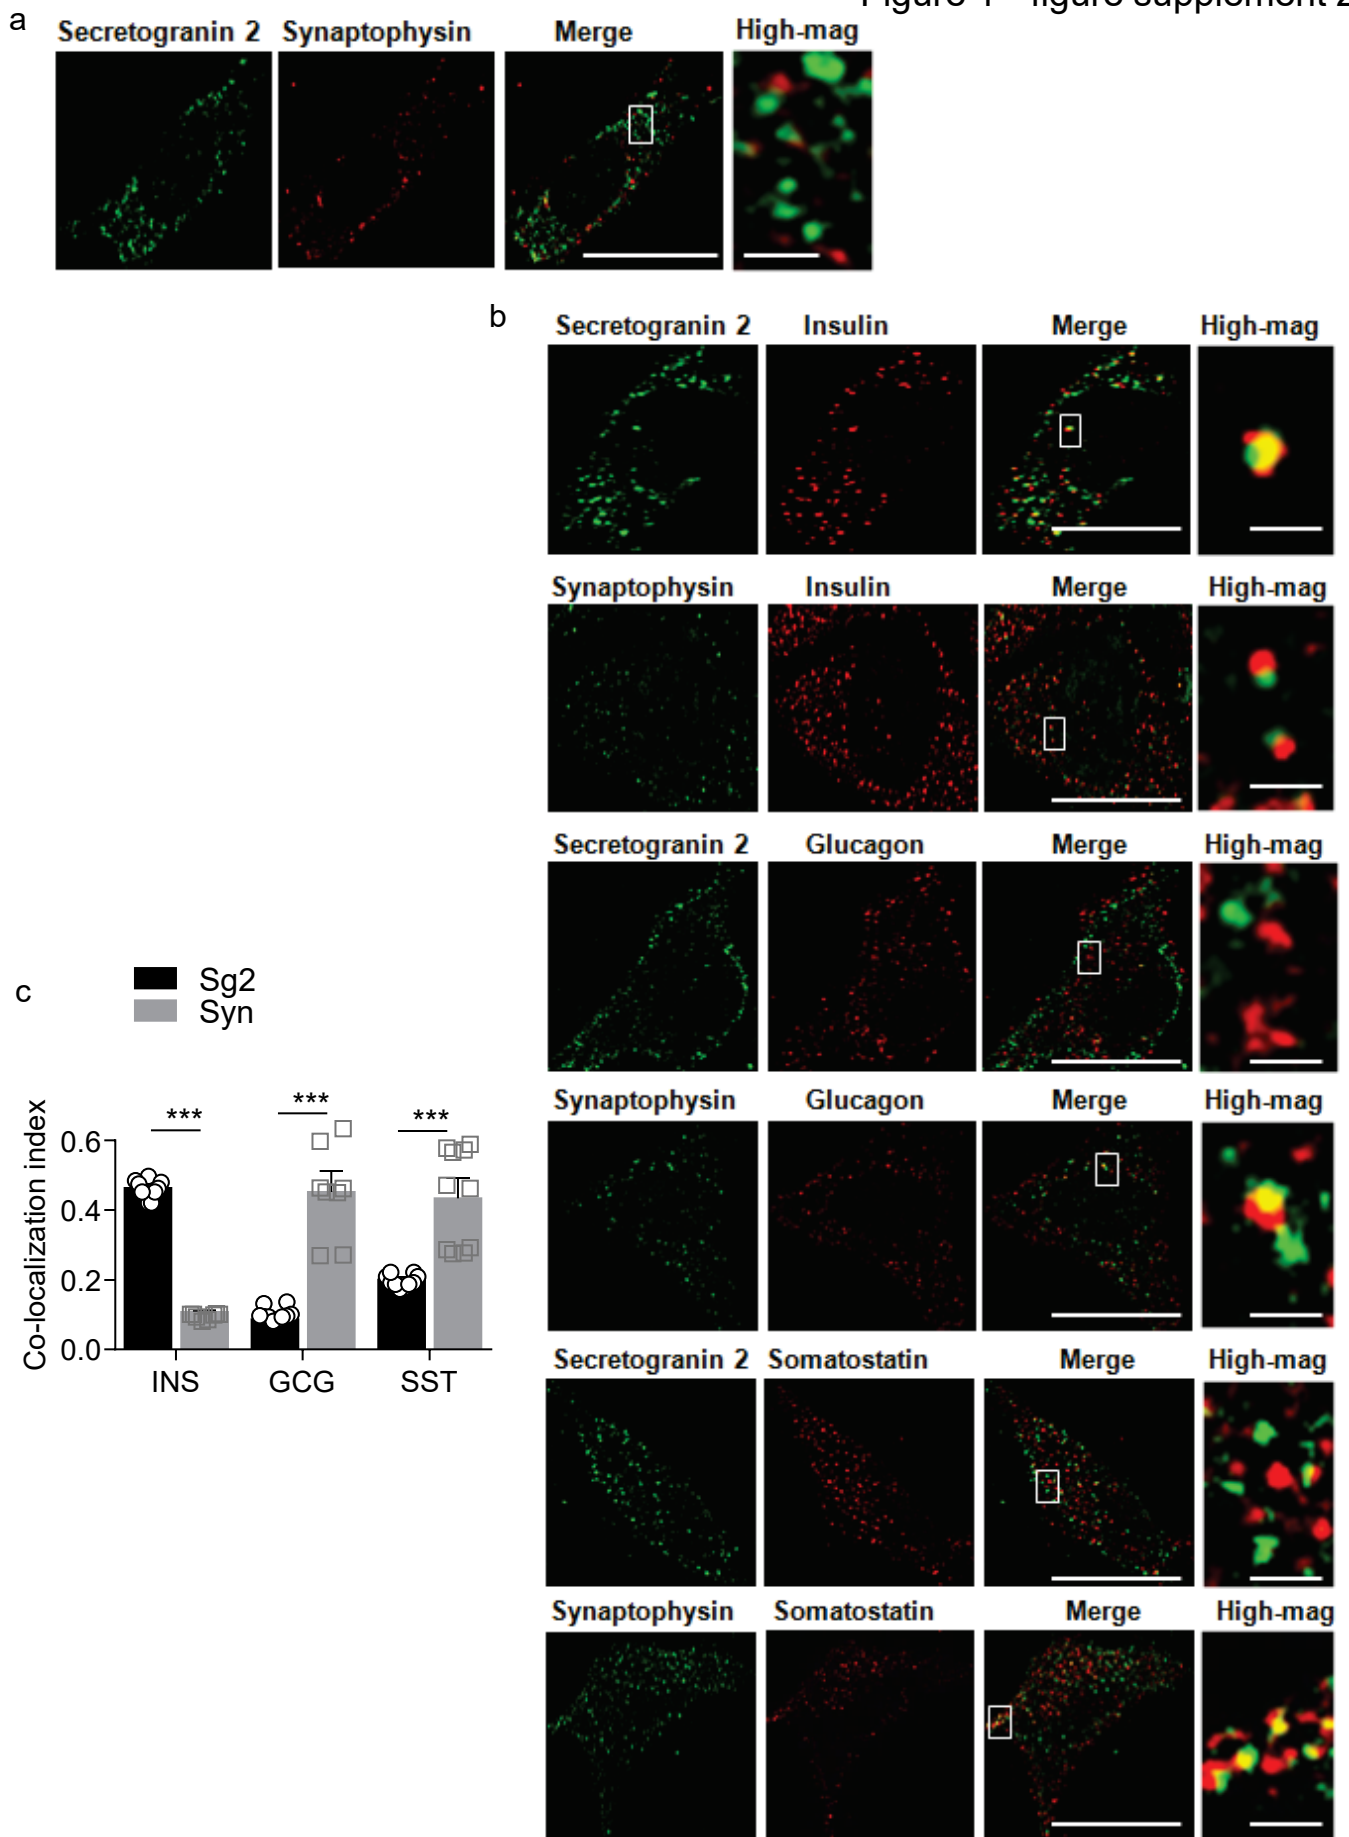

Supplement: supp [file elife-52580-supp-v1.zip]

Figure 3—figure supplement 2

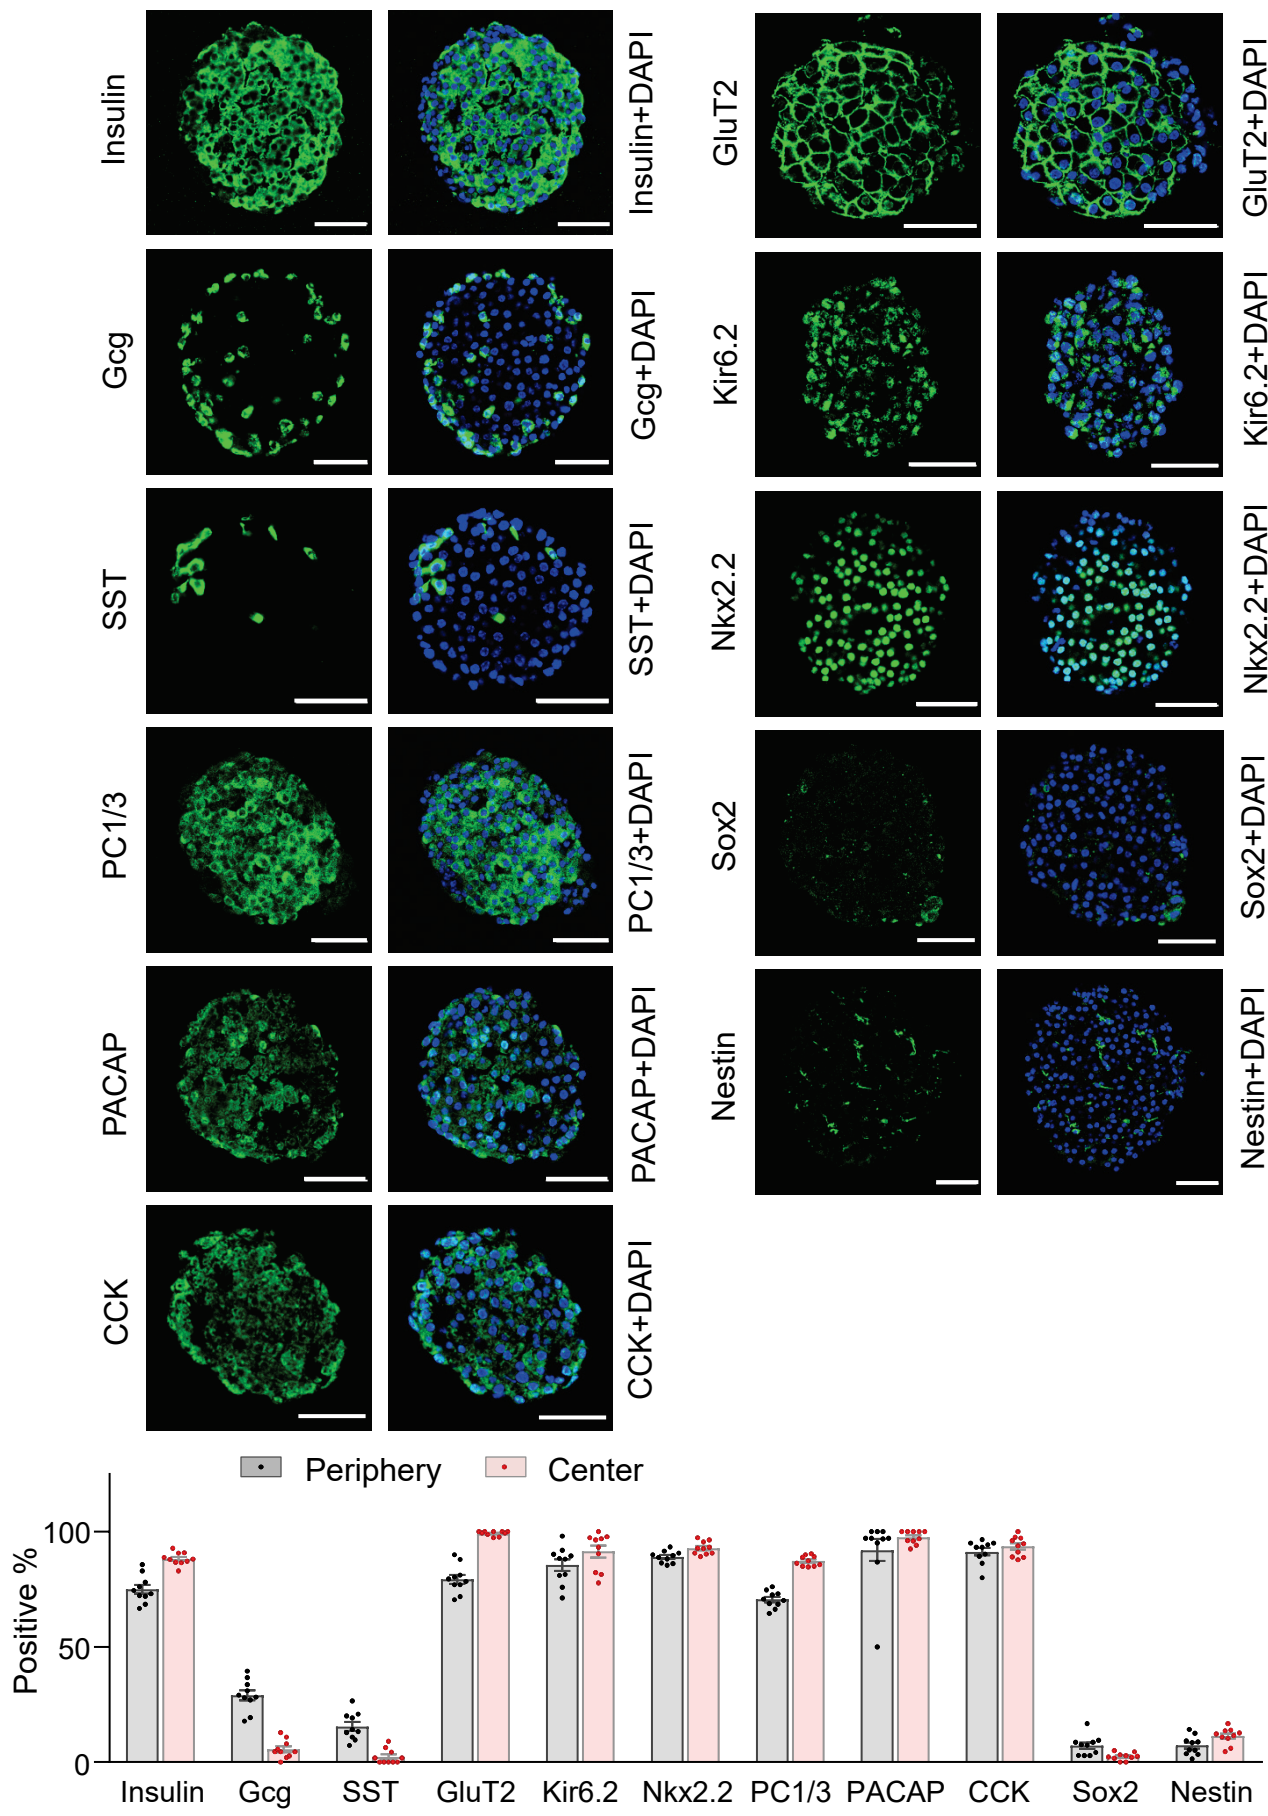

Supplement: supp [file elife-52580-supp-v1.zip]

Figure 1—figure supplement 1

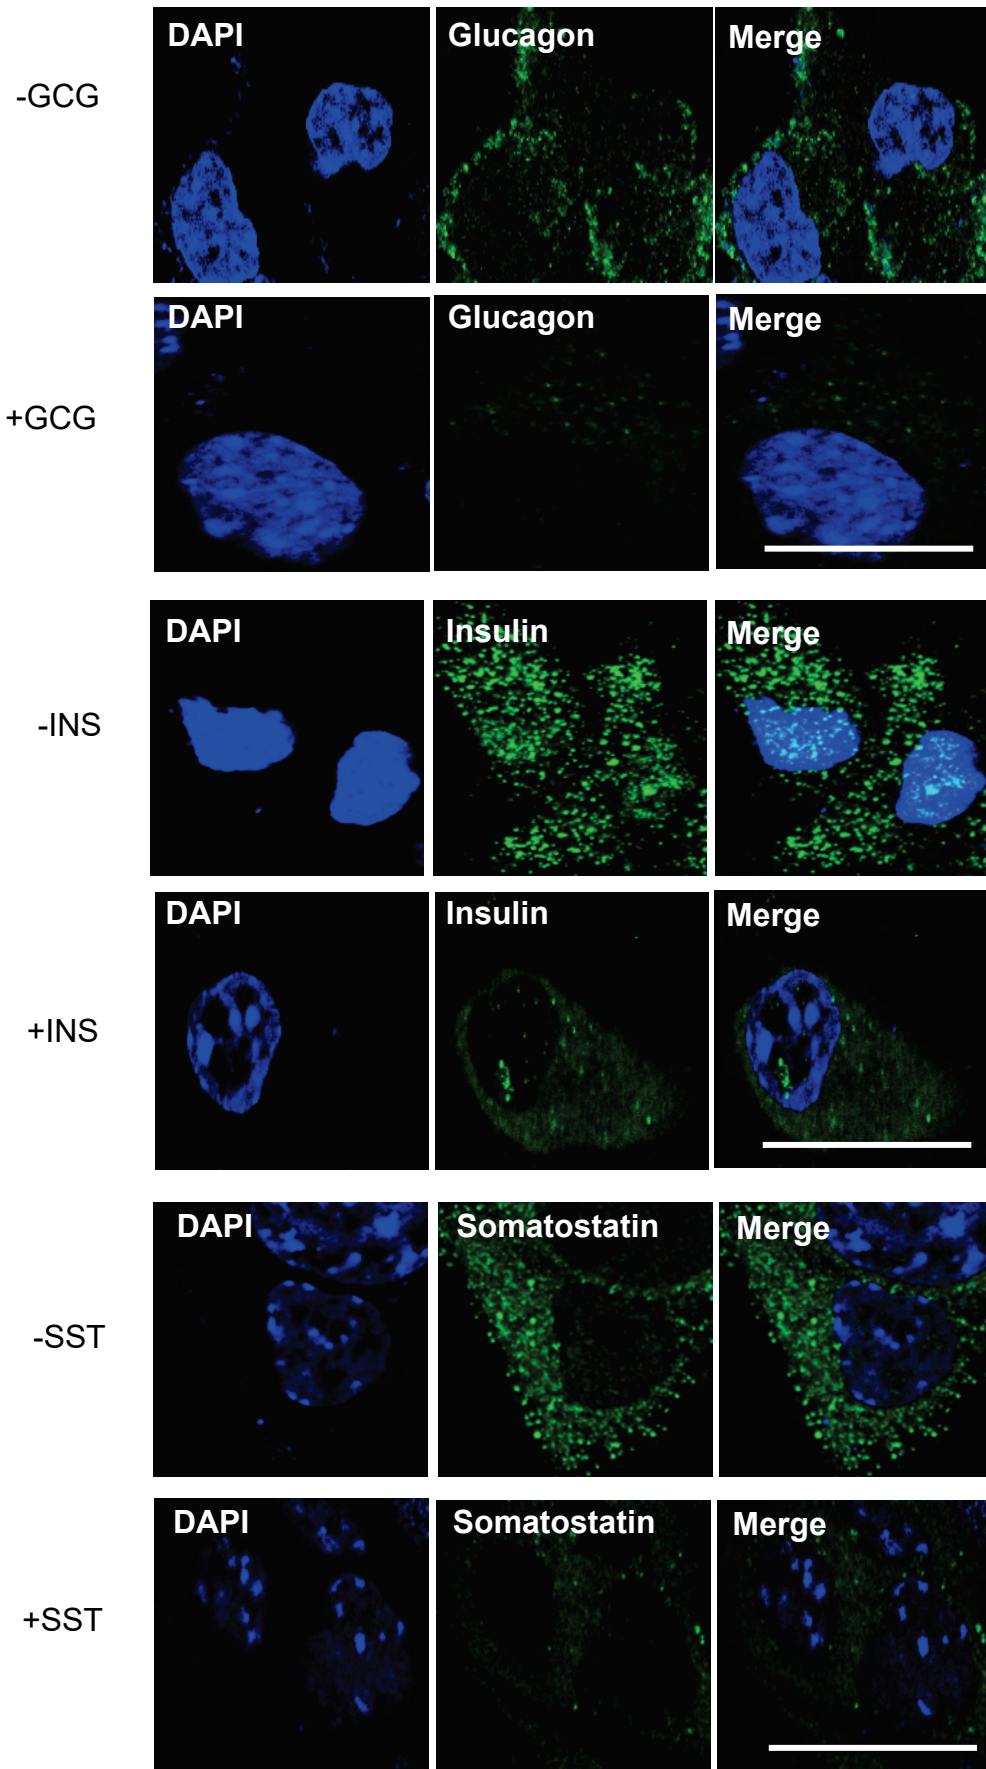

Supplement: supp [file elife-52580-supp-v1.zip]

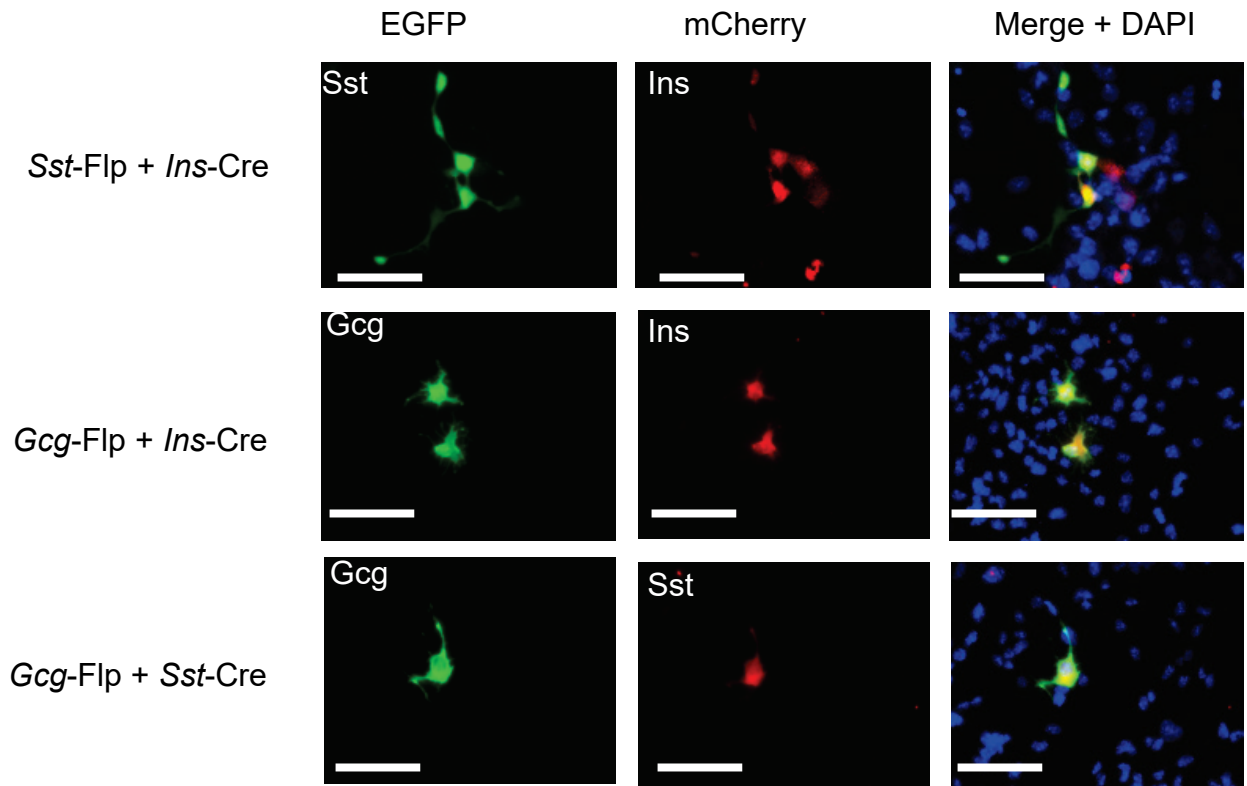

Supplement: supp [file elife-52580-supp-v1.zip]

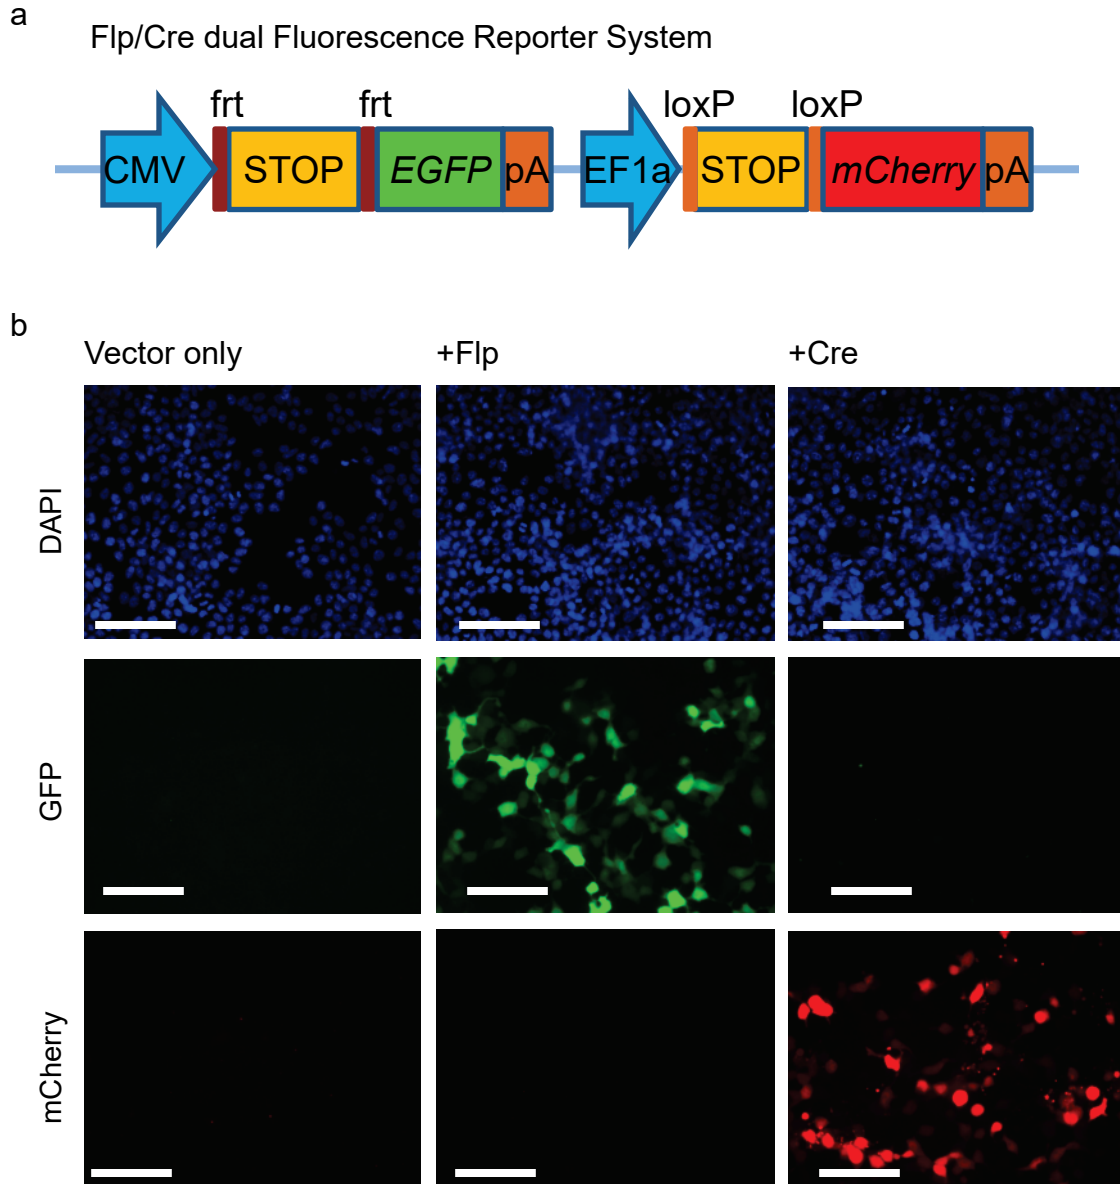

Supplement: supp [file elife-52580-supp-v1.zip]

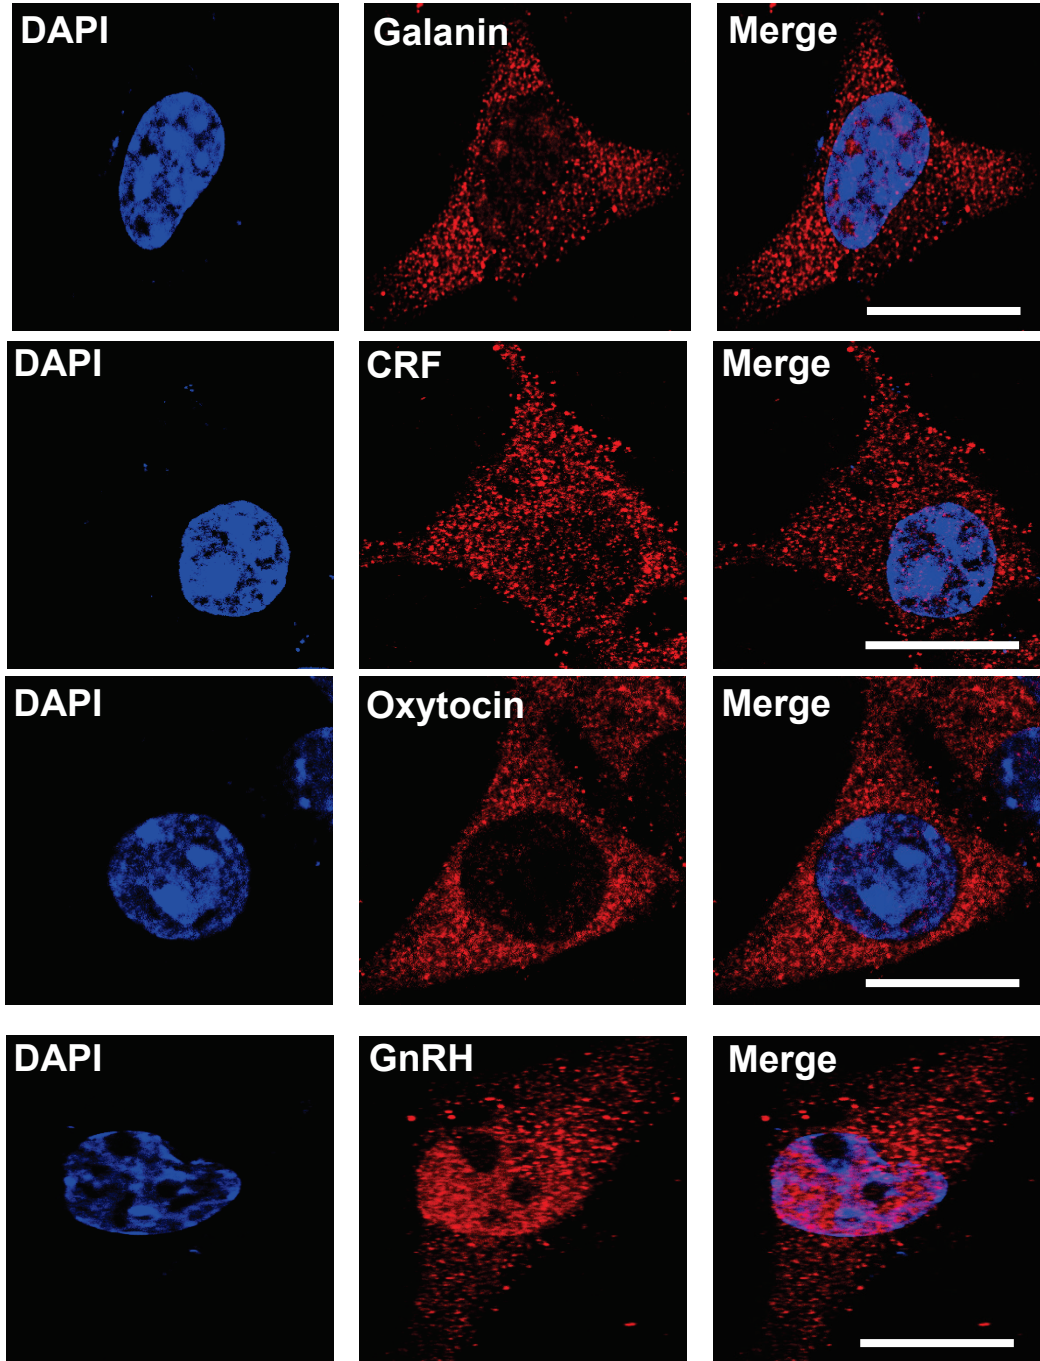

Supplement: supp [file elife-52580-supp-v1.zip]
